# Supplementary material
Source: publisher site journal article supplement (https://www.dovepress.com/article/398570)
Supplement: Supplementary file 1 [file get_supplementary_file.php]

## Appendix 1. Search strategy: July 2019 and May 2021

Age: No limitation of age

Language: English and Scandinavian Languages

Qualitative studies: This is uncertain filter in most databases and was not a limitation in the initial search strategies.

### AgeLine

| SU = Subject, TI = Title                                                                                                                                                                                                                                                                                                                           |                                                                                                               |                                                                                                           |
|----------------------------------------------------------------------------------------------------------------------------------------------------------------------------------------------------------------------------------------------------------------------------------------------------------------------------------------------------|---------------------------------------------------------------------------------------------------------------|-----------------------------------------------------------------------------------------------------------|
| (SU Dementia OR SU Alzheimer's disease OR SU cognitive impairment)<br>AND (TI dementia friendly society OR dementia friendly communities OR TI dementia village OR dementia friendly)<br>AND (SU Experiences OR SU Perceptions OR SU Challenges OR SU Barriers OR SU Difficulties)                                                                 | <b>Date 8.7.2019</b><br>Records identified: 53<br>Records remaining after duplications removed in Endnote: 36 | <b>10.5.2021</b><br>Records identified: 26<br>Records remaining after duplications removed in Endnote: 11 |
| (SU Dementia OR SU Alzheimer's disease OR SU cognitive impairment)<br>AND (TI dementia friendly society OR TI dementia friendly communities OR TI dementia village OR TI dementia friendly OR TI physical environment OR TI psychosocial environment)<br>AND (SU Experiences OR SU Perceptions OR SU Challenges OR SU Barriers OR SU Difficulties) | <b>Date 8.7.2019</b><br>Records identified: 49<br>Records remaining after duplications removed in Endnote: 27 | <b>10.5.2021</b><br>Records identified: 33<br>Records remaining after duplications removed in Endnote: 11 |
| Total records identified: 102 + 59 = <b>161</b><br>Total records remaining after duplications removed: 63 + 22 = <b>85</b>                                                                                                                                                                                                                         |                                                                                                               |                                                                                                           |

### CINAHL

| SU = Subject, TI = Title                                                                                                                                                                                                                                                                 |                                                                                                               |                                                                                                          |
|------------------------------------------------------------------------------------------------------------------------------------------------------------------------------------------------------------------------------------------------------------------------------------------|---------------------------------------------------------------------------------------------------------------|----------------------------------------------------------------------------------------------------------|
| (SU Dementia OR SU Alzheimer's disease OR SU cognitive impairment)<br>AND (TI dementia friendly society OR TI dementia friendly communities OR TI dementia village OR TI dementia friendly)<br>AND (SU Experiences OR SU Perceptions OR SU Challenges OR SU Barriers OR SU Difficulties) | <b>Date 8.7.2019</b><br>Records identified: 40<br>Records remaining after duplications removed in Endnote: 15 | <b>10.5.2021</b><br>Records identified: 40<br>Records remaining after duplications removed in Endnote: 6 |
| (SU Dementia OR SU Alzheimer's disease OR SU cognitive impairment)                                                                                                                                                                                                                       | <b>Date 8.7.2019</b><br>Records identified: 55                                                                | <b>10.5.2021</b><br>Records identified: 50                                                               |

|                                                                                                                                                                                                                                                                           |                                                             |                                                             |
|---------------------------------------------------------------------------------------------------------------------------------------------------------------------------------------------------------------------------------------------------------------------------|-------------------------------------------------------------|-------------------------------------------------------------|
| AND (TI dementia friendly society OR TI dementia friendly communities OR TI dementia village OR TI dementia friendly OR TI physical environment OR TI psychosocial environment) AND (SU Experiences OR SU Perceptions OR SU Challenges OR SU Barriers OR SU Difficulties) | Records remaining after duplications removed in Endnote: 27 | Records remaining after duplications removed in Endnote: 12 |
| Total records identified: 95 + 90 = <b>185</b><br>Total records remaining after duplications removed: 42 + 18 = <b>60</b>                                                                                                                                                 |                                                             |                                                             |

### EMBASE

|                                                                                                                                                                                                                                                                                                                                                                                                                   |                                                                                                               |                                                                                                           |
|-------------------------------------------------------------------------------------------------------------------------------------------------------------------------------------------------------------------------------------------------------------------------------------------------------------------------------------------------------------------------------------------------------------------|---------------------------------------------------------------------------------------------------------------|-----------------------------------------------------------------------------------------------------------|
| ab = abstract OR hw = heading word OR kw= keyword OR sh= subject heading OR ti = title                                                                                                                                                                                                                                                                                                                            |                                                                                                               |                                                                                                           |
| (Dementia OR Alzheimer's disease OR Dementia vascular OR vascular dementia OR cognitive impairment) hw OR kw OR sh AND (dementia friendly society OR dementia friendly communities OR dementia village OR dementia friendly) ab OR hw OR kw OR sh OR ti<br>AND (Experiences OR Perceptions OR Challenges OR Barriers OR Difficulties) ab OR hw OR kw OR sh OR ti                                                  | <b>Date 8.7.2019</b><br>Records identified: 49<br>Records remaining after duplications removed in Endnote: 6  | <b>10.5.2021</b><br>Records identified: 71<br>Records remaining after duplications removed in Endnote: 11 |
| (Dementia OR Alzheimer's disease OR Dementia vascular OR vascular dementia OR cognitive impairment) hw OR kw OR sh AND (dementia friendly society OR dementia friendly communities OR dementia village OR dementia friendly OR physical environment OR psychosocial environment) ab OR hw OR kw OR sh OR ti AND (Experiences OR Perceptions OR Challenges OR Barriers OR Difficulties) ab OR hw OR kw OR sh OR ti | <b>Date 8.7.2019</b><br>Records identified: 76<br>Records remaining after duplications removed in Endnote: 28 | <b>10.5.2021</b><br>Records identified: 90<br>Records remaining after duplications removed in Endnote: 13 |
| Total records identified: 125 + 161 = <b>286</b><br>Total records remaining after duplications removed: 34 + 24 = <b>58</b>                                                                                                                                                                                                                                                                                       |                                                                                                               |                                                                                                           |

### MedLine

|                                                                                                                                       |                                                |                                            |
|---------------------------------------------------------------------------------------------------------------------------------------|------------------------------------------------|--------------------------------------------|
| ab = abstract OR hw = subject heading word OR kf = keyword heading word OR kw = keyword heading OR sh = subject heading OR ti = title |                                                |                                            |
| (Dementia OR Alzheimer's disease OR Dementia vascular                                                                                 | <b>Date 8.7.2019</b><br>Records identified: 36 | <b>10.5.2021</b><br>Records identified: 59 |

|                                                                                                                                                                                                                                                                                                                                                                                                                                     |                                                                                                               |                                                                                                           |
|-------------------------------------------------------------------------------------------------------------------------------------------------------------------------------------------------------------------------------------------------------------------------------------------------------------------------------------------------------------------------------------------------------------------------------------|---------------------------------------------------------------------------------------------------------------|-----------------------------------------------------------------------------------------------------------|
| OR vascular dementia OR cognitive impairment) hw OR kf OR kw OR sh. AND (dementia friendly society OR dementia friendly communities OR dementia village OR dementia friendly) ab OR hw OR kf OR kw OR sh OR ti AND (Experiences OR Perceptions OR Challenges OR Barriers OR Difficulties) ab OR hw OR kf OR kw OR sh OR ti                                                                                                          | Records remaining after duplications removed in Endnote: 6                                                    | Records remaining after duplications removed in Endnote: 5                                                |
| (Dementia OR Alzheimer's disease OR Dementia vascular OR vascular dementia OR cognitive impairment) hw OR kf OR kw OR sh AND (dementia friendly society OR dementia friendly communities OR dementia village OR dementia friendly OR physical environment OR psychosocial environment) ab OR hw OR kf OR kw OR sh OR ti AND (Experiences OR Perceptions OR Challenges OR Barriers OR Difficulties) ab OR hw OR kf OR kw OR sh OR ti | <b>Date 8.7.2019</b><br>Records identified: 54<br>Records remaining after duplications removed in Endnote: 13 | <b>10.5.2021</b><br>Records identified: 86<br>Records remaining after duplications removed in Endnote: 17 |
| Total records identified: 90 + 145 = <b>235</b><br>Total records remaining after duplications removed: 19 + 22 = <b>41</b>                                                                                                                                                                                                                                                                                                          |                                                                                                               |                                                                                                           |

### PsycINFO

|                                                                                                                                                                                                                                                                                                                                                               |                                                                                                               |                                                                                                          |
|---------------------------------------------------------------------------------------------------------------------------------------------------------------------------------------------------------------------------------------------------------------------------------------------------------------------------------------------------------------|---------------------------------------------------------------------------------------------------------------|----------------------------------------------------------------------------------------------------------|
| ab = abstract OR mh= MeSH OR hw= heading word OR sh= subject heading OR ti= title                                                                                                                                                                                                                                                                             |                                                                                                               |                                                                                                          |
| (Dementia OR Alzheimer's disease OR Dementia vascular OR vascular dementia OR cognitive impairment) mh OR hw OR sh AND (dementia friendly society OR dementia friendly communities OR dementia village OR dementia friendly) ab OR mh OR hw OR sh OR ti AND (Experiences OR Perceptions OR Challenges OR Barriers OR Difficulties) ab OR mh OR hw OR sh OR ti | <b>Date 8.7.2019</b><br>Records identified: 21<br>Records remaining after duplications removed in Endnote: 1  | <b>10.5.2021</b><br>Records identified: 25<br>Records remaining after duplications removed in Endnote: 2 |
| (Dementia OR Alzheimer's disease OR Dementia vascular OR vascular dementia OR cognitive impairment) mh OR hw OR sh AND (dementia friendly society OR dementia friendly communities OR                                                                                                                                                                         | <b>Date 8.7.2019</b><br>Records identified: 47<br>Records remaining after duplications removed in Endnote: 12 | <b>10.5.2021</b><br>Records identified: 29<br>Records remaining after duplications removed in Endnote: 3 |

|                                                                                                                                                                                                                             |  |  |
|-----------------------------------------------------------------------------------------------------------------------------------------------------------------------------------------------------------------------------|--|--|
| dementia village OR dementia friendly OR physical environment OR psychosocial environment) ab OR mh OR hw OR sh OR ti AND (Experiences OR Perceptions OR Challenges OR Barriers OR Difficulties) ab OR mh OR hw OR sh OR ti |  |  |
| Total records identified: 68 + 54 = <b>122</b><br>Total records remaining after duplications removed: 13 + 5 = <b>18</b>                                                                                                    |  |  |

### PubMed

|                                                                                                                                                                                                                                                                                                                                                                   |                                                                                                               |                                                                                                           |
|-------------------------------------------------------------------------------------------------------------------------------------------------------------------------------------------------------------------------------------------------------------------------------------------------------------------------------------------------------------------|---------------------------------------------------------------------------------------------------------------|-----------------------------------------------------------------------------------------------------------|
| Title/Abstract, MeSH Terms                                                                                                                                                                                                                                                                                                                                        |                                                                                                               |                                                                                                           |
| (dementia friendly society OR dementia friendly communities OR dementia friendly OR dementia village) [Title/Abstract] AND (dementia) [MeSH Terms] OR (cognitive impairment OR Alzheimer disease) [Title/Abstract] AND (Experiences OR Perceptions OR Challenges OR Barriers OR Difficulties)[Title/Abstract]                                                     | <b>Date 8.7.2019</b><br>Records identified: 24<br>Records remaining after duplications removed in Endnote: 21 | <b>10.5.2021</b><br>Records identified: 25<br>Records remaining after duplications removed in Endnote: 2  |
| (physical environment OR psychosocial environment OR dementia friendly society OR dementia friendly communities OR dementia friendly OR dementia village) [Title/Abstract] AND (dementia) [MeSH Terms] OR (cognitive impairment OR Alzheimer disease) [Title/Abstract] AND (Experiences OR Perceptions OR Challenges OR Barriers OR Difficulties)[Title/Abstract] | <b>Date 8.7.2019</b><br>Records identified: 43<br>Records remaining after duplications removed in Endnote: 0  | <b>10.5.2021</b><br>Records identified: 27<br>Records remaining after duplications removed in Endnote: 13 |
| Total records identified: 67 + 52 = <b>119</b><br>Total records remaining after duplications removed: 21 + 15 = <b>36</b>                                                                                                                                                                                                                                         |                                                                                                               |                                                                                                           |

### Data base in Norwegian: ORIA/Biblioteket Aldring og helse

|                                                                                                     |                                                                                                              |  |
|-----------------------------------------------------------------------------------------------------|--------------------------------------------------------------------------------------------------------------|--|
| Demensvennlig                                                                                       | <b>Date 8.7.2019</b><br>Records identified: 11<br>Records remaining after duplications removed in Endnote: 8 |  |
| Total records identified: <b>11</b><br>Total records remaining after duplications removed: <b>8</b> |                                                                                                              |  |

**Svemed+**

|                                                                                                                |                                               |  |
|----------------------------------------------------------------------------------------------------------------|-----------------------------------------------|--|
| (physical environment OR psychosocial environment) AND (dementia OR Alzheimer disease OR cognitive impairment) | <b>Date 8.7.2019</b><br>Records identified: 3 |  |
| Total records identified: <b>3</b><br>Total records remaining after duplications removed: <b>0</b>             |                                               |  |

**Cochrane Library**

|                                                                       |                                               |  |
|-----------------------------------------------------------------------|-----------------------------------------------|--|
| Psychosocial environment OR Physical environment OR dementia friendly | <b>Date 8.7.2019</b><br>Records identified: 0 |  |
|-----------------------------------------------------------------------|-----------------------------------------------|--|

**Records remaining after duplicates removed: n = 306**

8.7.2019: 200 references were transferred using EndNote

10.5.2021: 106 references were transferred using EndNote
